# Supplementary material for: Transcription factor AP2 enhances malignancy of non-small cell lung cancer through upregulation of USP22 gene expression
Source: PubMed Central journal article supplement (PMC9484186; doi:10.1186/s12964-022-00946-9), 2022-09-19
Supplement: 12964_2022_946_MOESM2_ESM.pdf [file 12964_2022_946_MOESM2_ESM.pdf]

FigureS1

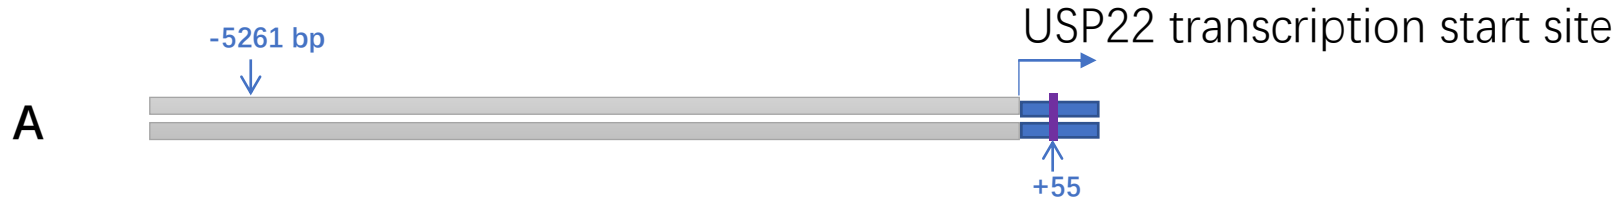

Transcriptional factors prediction

B

|     |                  |     |                            |     |                   |     |                  |     |                |     |                 |     |              |     |                              |
|-----|------------------|-----|----------------------------|-----|-------------------|-----|------------------|-----|----------------|-----|-----------------|-----|--------------|-----|------------------------------|
| 0   | POU1F1a [T0069]  | 1   | C/EBPbeta [T00581]         | 2   | C/EBPalpha [T0013 | 3   | NF-Y [T00150]    | 4   | NF-1 [T00539]  | 5   | GR-alpha [T0036 | 6   | TFII-I [T007 | 7   | NF-AT2 [T01945]              |
| 8   | STAT4 [T01577]   | 9   | NF-AT1 [T01948]            | 10  | NF-AT1 [T01944]   | 11  | c-Ets-1 [T00112] | 12  | YY1 [T00915]   | 13  | STAT1beta [T0   | 14  | c-Jun [T0015 | 15  | c-Myb [T00137]               |
| 16  | LEF-1 [T02905]   | 17  | LXR-alpha:RXR-alpha [T0532 | 18  | HNF-1A [T01211]   | 19  | LyF-1 [T00479]   | 20  | SRY [T00997]   | 21  | TCF-4E [T02878  | 22  | NFI/CTF [T   | 23  | GR [T05076]                  |
| 24  | HNF-4alpha2 [T0  | 25  | HNF-4alpha1 [T02429]       | 26  | Crx [T03461]      | 27  | AR [T00040]      | 28  | XBP-1 [T00902] | 29  | c-Ets-1 68 [T00 | 30  | NF-Y [T00631 | 31  | C/EBPgamma [T02028]          |
| 32  | ER-alpha [T00261 | 33  | c-Ets-2 [T00113]           | 34  | HOXD8 [T01426]    | 35  | HOXD8 [T01754]   | 36  | GR-beta [T0192 | 37  | POU1F1b [T013   | 38  | POU1F1c [T   | 39  | HNF-3beta [T01049]           |
| 40  | HNF-1A [T00368]  | 41  | TFIID [T00820]             | 42  | HNF-3alpha [T025  | 43  | FOXP3 [T04280]   | 44  | PR B [T00696]  | 45  | PR A [T01661]   | 46  | HNF-1C [T    | 47  | HNF-1B [T01950]              |
| 48  | HOXD9 [T01424]   | 49  | HOXD10 [T01425]            | 50  | HOXD9 [T01755]    | 51  | HOXD9 [T01756]   | 52  | HOXD10 [T0175  | 53  | HOXD10 [T017    | 54  | AP-2alpha [T | 55  | c-Jun [T00131]               |
| 56  | IRF-1 [T00423]   | 57  | NF-AT1 [T00550]            | 58  | C/EBPalpha [T001  | 59  | NF-1 [T00535]    | 60  | HNF-4alpha1 [T | 61  | c-Jun [T00133]  | 62  | AP-1 [T006   | 63  | ENKTF-1 [T00255]             |
| 64  | AhR [T01795]     | 65  | AhR:Arnt [T05394]          | 66  | Ik-1 [T02702]     | 67  | HNF-4alpha [T038 | 68  | USF-1 [T00875] | 69  | COUP-TF1 [T00   | 70  | GR [T0033    | 71  | PEA3 [T00685]                |
| 72  | RXR-alpha [T013  | 73  | RAR-beta [T00721]          | 74  | PPAR-alpha:RXR-   | 75  | VDR [T00885]     | 76  | PXR-1:RXR-alf  | 77  | GATA-3 [T0031   | 78  | Elk-1 [T007  | 79  | CAC-binding protein [T00076] |
| 80  | GATA-1 [T00305]  | 81  | GATA-2 [T00308]            | 82  | GATA-1 [T00306]   | 83  | C/EBPbeta [T0045 | 84  | E2F-1 [T01542] | 85  | POU2F2 (Oct-2   | 86  | SREBP-1c [T  | 87  | T3R-beta1 [T00851]           |
| 88  | VDR [T01369]     | 89  | IRF-2 [T00425]             | 90  | IRF-2 [T01491]    | 91  | STAT5A [T04683]  | 92  | NF-kappaB1 [T  | 93  | Egr-3 [T00243]  | 94  | Egr-1 [T01   | 95  | Egr-3 [T05889]               |
| 96  | USF2 [T00878]    | 97  | Pax-5 [T00070]             | 98  | p53 [T00671]      | 99  | NF-1/L [T00599]  | 100 | Sp1 [T00759]   | 101 | RAR-beta:RXR-   | 102 | PU.1 [T007   | 103 | ATF3 [T01313]                |
| 104 | POU2F1 [T00641]  | 105 | C/EBPbeta [T00017]         | 106 | AP-1 [T00029]     | 107 | CREB [T00163]    | 108 | CREBbeta [T02  | 109 | ATF-2 [T00167]  | 110 | ATF [T000    | 111 | RBP-Jkappa [T01616]          |
| 112 | PU.1 [T02068]    | 113 | MEF-2A [T01005]            | 114 | MycD [T00526]     | 115 | RelA [T00594]    | 116 | AP-2 [T00034]  | 117 | E2F [T00221]    | 118 | c-Ets-1 [T0  | 119 | WT1 [T00899]                 |
| 120 | GCF [T00320]     | 121 | EBF [T05427]               | 122 | AP-2beta [T02469] | 123 | ATF-1 [T00968]   | 124 | CREB [T00164]  | 125 | ETF [T00270]    | 126 | Elk-1 [T05   | 127 | HES-1 [T01649]               |
| 128 | MAZ [T00490]     | 129 | NF-kappaB [T00590]         | 130 | IPF1 [T02057]     | 131 | HNF-4alpha [T052 | 132 | RAR-alpha1 [T0 | 133 | CTF [T00174]    | 134 | FOXF1 [T0    | 135 | TBP [T00794]                 |

Predicted by PROMO Nucleic Acids Res, 31, 13, 3651-3653,2003

FigureS1 Predicted transcriptional Factors.

**Figure S2**

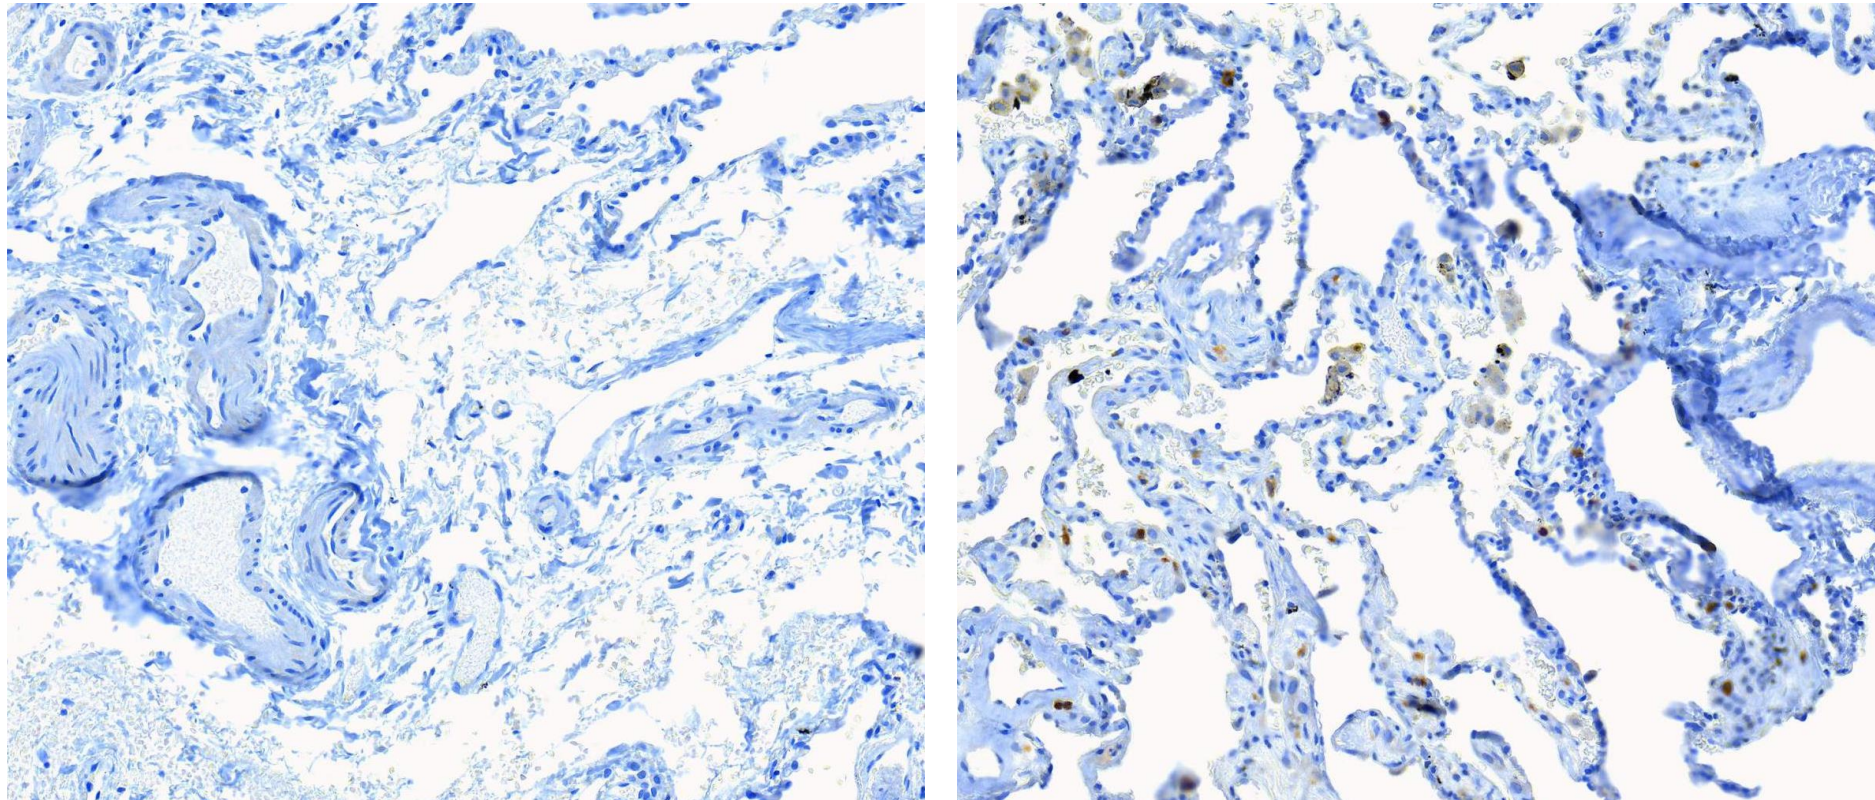

**Figure S2** Representative IHC staining image for normal lung tissue. A,TFAP2A. B, TFAP2B.

**Supplementary Table 1** Primers used in this study

| Primers for qPCR |     |                         |
|------------------|-----|-------------------------|
| Gene             | F/R | sequence                |
| USP22            | F   | CTGGAGCTGGACATGACCCCTT  |
|                  | R   | GTAGTGGCCACTCTCCAAGGTCC |
| TFAP2A           | F   | ACTCCTTACCTCACGCCATC    |
|                  | R   | TTGCTGTTGGACTTGGACAG    |
| TFAP2B           | F   | CGTCCAGTCAGTTGATGC      |
|                  | R   | CCCAGGCCGTCTTTATT       |
| PPAPA            | F   | CAGCTGCAAGATCCAGAAAA    |
|                  | R   | AGATCTTGGCATTTCGTCAA    |
| cMyc             | F   | CCTGGTGCTCCATGAGGAGAC   |
|                  | R   | CAGACTCTGACCTTTTGCCAGG  |
| NFYA             | F   | CCCAGCAGATCATCCA        |
|                  | R   | CAGTCTGTGCCACTTGCTGT    |
| SP1              | F   | CAGGTGCACCCAATTCAA      |
|                  | R   | TCCACCTGCTGTGTCATCAT    |

| Primers for clone USP22 promoter          |    |                                                                    |
|-------------------------------------------|----|--------------------------------------------------------------------|
| USP22PO                                   | F1 | CCGGGTACCCCTATTGGCCAGGTCCCTTTTTTC                                  |
|                                           | F2 | CCGGGTACCACCTTCAGTGATCCACCCACCTTG                                  |
|                                           | F3 | CCGGGTACCTTCTTTCTTCCAGGGCTTCCAT                                    |
|                                           | F4 | CCGGGTACCGAAGTTCAAACCAGGCTGACG                                     |
|                                           | F5 | CCGGGTACCCACGGAAAAGGAGGTGTGTGAT                                    |
|                                           | F6 | CCGGGTACCTCTCAGTTTGGCTTGGGTGAGT                                    |
|                                           | F7 | CCGGGTACC TGCAAACAGCTCCCGATTA                                      |
|                                           | R1 | CCGCTCGAGACTCGCGCGCCCGTTAGGCTCT                                    |
|                                           | R0 | CCGCTCGAGCGCGGAGGCCGGACAAAGATG                                     |
|                                           |    |                                                                    |
| primers for clone overexpression plasmids |    |                                                                    |
| FLAG-cMyc                                 | F  | CCGGGTACCACCATGGACTACAAGGATGACGATGACAAGGGACCCCTCAACGTTAGCTTCACCACA |
|                                           | R  | CCGCTCGAGCCTTACGCACAAGAGTTCGGTAGCTG                                |
| FLAG-TFAP2A                               | F  | GGCAAGCTTCCACCATGGACTACAAGACGATGACGACAAGTCCATACTTGCCAAAATGGG       |
|                                           | R  | GCCGAATTCTCACTTTCTGTGCTTCTCCT                                      |
| FLAG-TFAP2B                               | F  | GCCGGATCCACCATGGACTACAAGACGATGACGACAAGCACTCACCTCCTAGAGAC           |
|                                           | R  | GCCGG GAATTC TCATTTCTGTGTTTCTCCTCC                                 |

**Supplementary Table 2** siRNAs used in this study

| Gene Symbol | Full Gene Name                                        | Gene ID      | Sense siRNA Sequence   | Antisense siRNA Sequence |
|-------------|-------------------------------------------------------|--------------|------------------------|--------------------------|
| AHR         | aryl hydrocarbon receptor                             | <u>196</u>   | GGCUCUUUCAAGAUAGUAAtt  | UUACUAUCUUGAAAGAGCCct    |
| JUN         | jun proto-oncogene                                    | <u>3725</u>  | GGCACAGCUUAAACAGAAAtt  | UUUCUGUUUAAGCUGUGCCac    |
| TFAP2A      | binding protein 2 alpha)                              | <u>7020</u>  | AGAGAAAAACUGGACAAAAtt  | UUUUGUCCAGUUUUUCUCUta    |
| TFAP2B      | protein 2 beta)                                       | <u>7021</u>  | AGUUCAACUUCGAAGUACAtt  | UGUACUUCGAAGUUGAACUga    |
| KLF12       | Kruppel-like factor 12                                | <u>11278</u> | CAACUAUCCCGAU AUGGAAtt | UUCCAU AUCGGGAUAGUUGtg   |
| ZEB1        | zinc finger E-box binding homeobox 1                  | <u>6935</u>  | GGAAGAACGUGACAGCACAtt  | UGUGCUGUCACGUUCUCCgc     |
| ATF1        | activating transcription factor 1                     | <u>466</u>   | GAAUGUCGCAGAAAGAAGAtt  | UCUUCUUUCUGCGACAUUCtc    |
| ATF2        | activating transcription factor 2                     | <u>1386</u>  | GUGAUACUGUCAAGGUCAAtt  | UGACCUUUGACAGUAUCACca    |
| ATF3        | activating transcription factor 3                     | <u>467</u>   | GCAAAGUGCCGAAACAAGAtt  | UCUUGUUUCGGCACUUUGCag    |
| CEBPA       | CCAAT/enhancer binding protein (C/EBP), alpha         | <u>1050</u>  | CCGCUCCAAUGCCUACUGAtt  | UCAGUAGGCAUUGGAGCGGtg    |
| CEBPB       | CCAAT/enhancer binding protein (C/EBP), beta          | <u>1051</u>  | CCGCCUGCCUUUAAAUCCAAtt | UGGAUUUAAAGGCAGGCGGcg    |
| CEBPG       | CCAAT/enhancer binding protein (C/EBP), gamma         | <u>1054</u>  | CGGAUUUAGUGUUAUCCAAtt  | AUGGAUAACACUAAUUCGtt     |
| ETS1        | (avian)                                               | <u>2113</u>  | GGACUCUUUUGAAAGCAUAtt  | UAUGCUUUCAAAGAGUCctg     |
| ETS2        | (avian)                                               | <u>2114</u>  | GACAGAAGAUCAAUAUGAAtt  | UUCAUAUUGAUUCUUCUGUctt   |
| FOS         | v-fos FBJ murine osteosarcoma viral oncogene homolog  | <u>2353</u>  | CACUCCAAGCGGAGACAGAtt  | UCUGUCUCCGCUUGGAGUGta    |
| MYB         | v-myb avian myeloblastosis viral oncogene homolog     | <u>4602</u>  | GAAUUGCUCUCAAUGUCAAtt  | UUGACAUUAGGAGCAAUUCta    |
| MYC         | v-myc myelocytomatosis viral oncogene homolog (avian) | <u>4609</u>  | AGACCUUCAUCAAAAACAAtt  | AUGUUUUUGAUGAAGGUCUcg    |
| NR2F1       | nuclear receptor subfamily 2, group F, member 1       | <u>7025</u>  | UCUCAUCCGCGAU AUGUUAtt | UAACAUAUCGCGGAUGAGAg     |
| CREB1       | cAMP responsive element binding protein 1             | <u>1385</u>  | CAUUAGCCCAGGUAUCUAAtt  | AUAGAUACCGGGCUAAUGtg     |
| E2F1        | E2F transcription factor 1                            | <u>1869</u>  | GUCACGCUAUGAGACCUCAAtt | UGAGGUCUCAUAGCGUGACTt    |
| EGR1        | early growth response 1                               | <u>1958</u>  | CAACGACAGCAGUCCCAUAtt  | AAUGGGACUGCUGUCGUUGga    |
| ELK1        | ELK1, member of ETS oncogene family                   | <u>2002</u>  | GGCCUUGCGGUACUACUAAtt  | AUAGUAGUACCGCAAGGCCcg    |
| ESR1        | estrogen receptor 1                                   | <u>2099</u>  | ACAUCAUCUCGGUUCCGCAAtt | UGCGGAACCGAGAUGAUGUag    |
| TEAD2       | TEA domain family member 2                            | <u>8463</u>  | CCGUUCACCUUGUCACUGAtt  | UCAGUGACAAGGUGAACGGtg    |
| FOXA1       | forkhead box A1                                       | <u>3169</u>  | GCAAUACUCUUAACCAUAAAtt | UUAUGGUUAAGAGUAUUGCca    |
| FOXA2       | forkhead box A2                                       | <u>3170</u>  | GGACCUCAAGGCCUACGAAtt  | UUCGUAGGCCUUGAGGUCCat    |
| FOXA3       | forkhead box A3                                       | <u>3171</u>  | ACUCCUACAUGACCCUGAAAtt | UUCAGGGUCAUGUAGGAGUtg    |
| FOXC1       | forkhead box C1                                       | <u>2296</u>  | ACUCUCCAGUGAACGGGAAtt  | UUCGGUUCACUGGAGAGUtg     |
| FOXC2       | forkhead box C2 (MFH-1, mesenchyme forkhead 1)        | <u>2303</u>  | AGAAGGACGUGUCCAAGGAtt  | UCCUUGGACACGUCCUUCUtt    |
| FOXD1       | forkhead box D1                                       | <u>2297</u>  | GAAAAAUGGUUAACAUGUUAtt | AACAUGUUAACCAUUUUUCct    |
| FOXD3       | forkhead box D3                                       | <u>27022</u> | GCCACUCUCCGGACAGUUAtt  | AAACUGUCCGGAGAGUGGCac    |
| FOXE1       | forkhead box E1 (thyroid transcription factor 2)      | <u>2304</u>  | GCAAUUAUAUCAUAACUAtt   | UAAGUUAUGAUUAUUUGCtg     |

|               |                                                         |                  |                        |                        |
|---------------|---------------------------------------------------------|------------------|------------------------|------------------------|
| <u>FOXE3</u>  | forkhead box E3                                         | <u>2301</u>      | GGACACUUCUUGGAGAUUUt   | AAAUCUCCAAGAAGUGUCctc  |
| <u>FOXF2</u>  | forkhead box F2                                         | <u>2295</u>      | GAAAAGAUUUCGUCCUCAAtt  | UUGAGGACGAAAUCUUUUCtg  |
| <u>FOXG1</u>  | forkhead box G1                                         | <u>2290</u>      | GCAUCUACGAGUUCAUCAUtt  | AUGAUGAACUCGUAGAUGCcg  |
| <u>FOXJ1</u>  | forkhead box J1                                         | <u>2302</u>      | CUAAUUAGAUGACAGCAAAtt  | UUUGCUGUCAUCUAAUUAGca  |
| <u>FOXJ2</u>  | forkhead box J2                                         | <u>55810</u>     | GGAAGAAUUCAAUACGGCAtt  | UGCCGUAAUUGAAUUCUCCaa  |
| <u>FOXJ3</u>  | forkhead box J3                                         | <u>22887</u>     | GGAUGGUAGUGAUAGCCCAtt  | UGGGCUAUCACUACCAUCctg  |
| <u>FOXK1</u>  | forkhead box K1                                         | <u>221937</u>    | GUCGCUCUAUCACAAAGAAtt  | UUCUUUGUGAUAGAGCGACgt  |
| <u>FOXK2</u>  | forkhead box K2                                         | <u>3607</u>      | CACCAGCUACCAAUAAAAAtt  | UUUUUAUUGGUAGCUGGUGtt  |
| <u>FOXL1</u>  | forkhead box L1                                         | <u>2300</u>      | ACAUGUUUGAGAACGGCAAtt  | UUGCCGUUCUCAAACAUGUcc  |
| <u>FOXL2</u>  | forkhead box L2                                         | <u>668</u>       | CGAAGUUCGGUUCUACGAtt   | UCGUAGAACGGGAACUUCGcg  |
| <u>FOXM1</u>  | forkhead box M1                                         | <u>2305</u>      | GCUCAUACCGGUACCUAUtt   | AUAGGUACCAGGUUAGAGCtg  |
| <u>FOXN2</u>  | forkhead box N2                                         | <u>3344</u>      | GCAUUGAUCCAAAAGAAGAtt  | UCUUCUUUUGGAUCAAUUCtg  |
| <u>FOXN3</u>  | forkhead box N3                                         | <u>1112</u>      | CAUUUUCGGUAAUUUGCAAtt  | UUGCAAAAUACGGAAAAUGtt  |
| <u>FOXO1</u>  | forkhead box O1                                         | <u>2308</u>      | GGUGGAUGCUCAAUCCAGAtt  | UCUGGAUUGAGCAUCCACCaa  |
| <u>FOXO3</u>  | forkhead box O3                                         | <u>2309</u>      | CUCACUUCGGACUCACUAtt   | UAAGUGAGUCCGAAGUGAGca  |
| <u>FOXO4</u>  | forkhead box O4                                         | <u>4303</u>      | CCGCGAUCAUAGACCUAGAtt  | UCUAGGUCUAUGAUCGCGGca  |
| <u>FOXO6</u>  | forkhead box O6                                         | <u>100132074</u> | ACGACUUCUAGGACAGCGAtt  | UCGCUGUCCAUGAAGUCGUtg  |
| <u>FOXP1</u>  | forkhead box P1                                         | <u>27086</u>     | AGCUAACACUAAAUGAGAUtt  | AUCUCAUUUAGUGUUAGCUgc  |
| <u>FOXP4</u>  | forkhead box P4                                         | <u>116113</u>    | GCCUAUUUCCGCAGAAACAtt  | UGUUUCUGCGGAAAUAAGGCga |
| <u>FOXQ1</u>  | forkhead box Q1                                         | <u>94234</u>     | CACUAUAAAUGAUUAGACUtt  | AGUCAUAUCAUUUUAUAGUGtg |
| <u>FOXR2</u>  | forkhead box R2                                         | <u>139628</u>    | GGAUGAAGAUAAUGCAAGAtt  | UCUUGCAUUAUCUUAUCctt   |
| <u>C2orf3</u> | chromosome 2 open reading frame 3                       | <u>6936</u>      | GGAGUAUGAAAAUACGUAtt   | UACGUUUUUUCAUACUCCct   |
| <u>NR3C1</u>  | (glucocorticoid receptor)                               | <u>2908</u>      | GCAGGAUCAGAAGCCUAUUt   | AAUAGGCUUCUGAUCCUGCtg  |
| <u>HOXD9</u>  | homeobox D9                                             | <u>3235</u>      | GCUGUUCGCUGAAGGAGGAtt  | UCCUCCUUCAGCGAACAGCct  |
| <u>IKZF1</u>  | IKAROS family zinc finger 1 (Ikaros)                    | <u>10320</u>     | UGUGCUCAUGGUUCACAAAtt  | UUUGUGAACCAUGAGCACAtt  |
| <u>IRF1</u>   | interferon regulatory factor 1                          | <u>3659</u>      | CCUCUGAAGCUACAACAGAtt  | UCUGUUGUAGCUUCAGAGGtg  |
| <u>IRF2</u>   | interferon regulatory factor 2                          | <u>3660</u>      | GAGGAAUUAUGAAGGCAAAtt  | UUUGCCUCAAUAUUCUctt    |
| <u>NFE2L1</u> | nuclear factor (erythroid-derived 2)-like 1             | <u>4779</u>      | GCUGCGAGAUGAGAACGGAtt  | UCCGUUCUCAUCUCGCAGCcg  |
| <u>LEF1</u>   | lymphoid enhancer-binding factor 1                      | <u>51176</u>     | GUUGCUGAGUGUACUCUAAtt  | UUAGAGUACACUCAGCAACga  |
| <u>MAZ</u>    | transcription factor)                                   | <u>4150</u>      | CAAUCUCCGGAGGCACGAAtt  | UUCGUGCCUCCGGAGAUUGta  |
| <u>MEF2A</u>  | myocyte enhancer factor 2A                              | <u>4205</u>      | CCAACUCGGAUUAUUGUUGAtt | UCAACAUAUCCGAGUUGGtt   |
| <u>NFIC</u>   | nuclear factor I/C (CCAAT-binding transcription factor) | <u>4782</u>      | AAUUUAGAGUGAACAAGAAtt  | UUCUUGUUCACUCUAAUUUtc  |
| <u>NFIX</u>   | nuclear factor I/X (CCAAT-binding transcription factor) | <u>4784</u>      | GAAUCCGGACAAUCAGAUAtt  | UAUCUGAUUGUCCGGAUUCcg  |
| <u>NFKB1</u>  | B-cells 1                                               | <u>4790</u>      | GGCUCAUGUUUACAGCUUUtt  | AAAGCUGUAAACAUGAGCCgc  |
| <u>NFYA</u>   | nuclear transcription factor Y, alpha                   | <u>4800</u>      | CAAUACCACCGUAAUUCUAtt  | UAAGAAUACGGUGGUUUUGtt  |
| <u>TP53</u>   | tumor protein p53                                       | <u>7157</u>      | GUAUCUACUGGGACGGAAAtt  | UUCCGUCCCAGUAGAUUACca  |

|               |                                                           |              |                       |                       |
|---------------|-----------------------------------------------------------|--------------|-----------------------|-----------------------|
| <u>PAX5</u>   | paired box 5                                              | <u>5079</u>  | GGCUCGUCGUACUCCAUCAtt | UGAUGGAGUACGACGAGCCgg |
| <u>POU2F1</u> | POU class 2 homeobox 1                                    | <u>5451</u>  | CGCAAAAUCUUCUAACGCAtt | UGCGUUAGAAGAUUUUGCGct |
| <u>PPARA</u>  | peroxisome proliferator-activated receptor alpha          | <u>5465</u>  | GAUCAAGUGACAUUGCUAAtt | UUAGCAAUGUCACUUGAUCgt |
| <u>RARA</u>   | retinoic acid receptor, alpha                             | <u>5914</u>  | GAAGAUUACUGACCUGCGAtt | UCGCAGGUCAGUAAUCUUCat |
| <u>RARB</u>   | retinoic acid receptor, beta                              | <u>5915</u>  | GAACCGACAAAAGUAGAUAtt | UAUCUACUUUUGUCGGUUCct |
| <u>RBP1</u>   | kappa J region                                            | <u>3516</u>  | GGAAGCUAUGCGAAAUUAtt  | UAAUUUCGCAUAGCUUCCta  |
| <u>RELA</u>   | (avian)                                                   | <u>5970</u>  | CCUUUACGUCAUCCUGAtt   | UCAGGGAUGACGUAAGGGat  |
| <u>RXRA</u>   | retinoid X receptor, alpha                                | <u>6256</u>  | UCGUCCUCUUUAACCCUGAtt | UCAGGGUUAAGAGGACGAtg  |
| <u>SALL3</u>  | sal-like 3 (Drosophila)                                   | <u>27164</u> | CGCGGUUUAUCGAGGAUAAtt | UUAUCCUCGAUAAACCGCGtg |
| <u>SP1</u>    | Sp1 transcription factor                                  | <u>6667</u>  | GCAACAUGGGAAUUAUGAAtt | UUCAUAAUCCCAUGUUGCtg  |
| <u>SRY</u>    | sex determining region Y                                  | <u>6736</u>  | CAACAGCGAUGAUUACAGUtt | ACUGUAAUCAUCGCGUUGGaa |
| <u>STAT1</u>  | signal transducer and activator of transcription 1, 91kDa | <u>6772</u>  | CCUACGAACAUGACCCUAUtt | AUAGGGUCAUGUUCGUAGGtg |
| <u>TAF1B</u>  | polymerase I, B, 63kDa                                    | <u>9014</u>  | CAUUUGAUCCUAUAGCUAAtt | UUAGCUAUAGGAUCAAUGtc  |
| <u>TCE3</u>   | binding factors E12/E47)                                  | <u>6929</u>  | CCUGCAGAGUAAGAUAGAAtt | UUCUAUCUUACUCUGCAGGcc |
| <u>TCF4</u>   | transcription factor 4                                    | <u>6925</u>  | GAAGGAUAUCAAAUCAAUtt  | AAUUGAUUUGAUAUCCUUCtt |
| <u>USE1</u>   | upstream transcription factor 1                           | <u>7391</u>  | AGGUGGAAGAUCUUAAAAAtt | UUUUUAAGAUCUCCACCUgt  |
| <u>USE2</u>   | upstream transcription factor 2, c-fos interacting        | <u>7392</u>  | CCUUACUCUCCAAAAAUtt   | AAUUUUUGGAGAGUAAGGGtg |
| <u>VDR</u>    | vitamin D (1,25- dihydroxyvitamin D3) receptor            | <u>7421</u>  | AGUUCAUUCUGACAGAUGAtt | UCAUCUGUCAGAAUGAACUcc |
| <u>WT1</u>    | Wilms tumor 1                                             | <u>7490</u>  | GGACUGUGAACGAAGGUUtt  | AAACCUUCGUUCACAGUCCtt |
| <u>XBP1</u>   | X-box binding protein 1                                   | <u>7494</u>  | CCUGCCUACUGGAUGCUUAtt | UAAGCAUCCAGUAGGCAGGaa |
| <u>YY1</u>    | YY1 transcription factor                                  | <u>7528</u>  | AGCUUUUGUUGAGAGUUCAtt | UGAACUCUCAACAAAAGCUtt |
